# Supplementary material
Source: PubMed Central journal article supplement (PMC4927377)
Supplement: NIHMS782534-supplement-1.pdf [file NIHMS782534-supplement-1.pdf]

## Supplementary Figures

Schematic of OTU and DADA2 approaches towards amplicon sequencing errors.

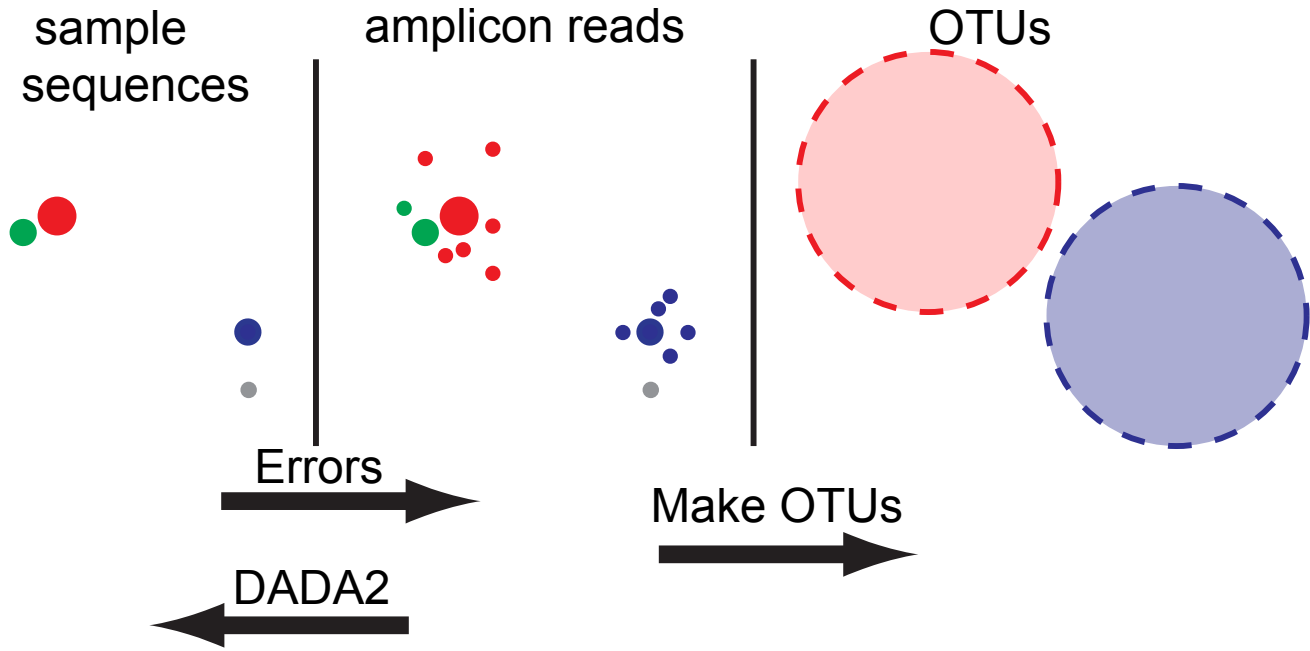

**Figure 1.** Circles represent identical sets of sequencing reads with size scaled by abundance and color corresponding to the true error-free sequence (there are four distinct sequences in the sample: red, green, blue and grey). Errors are introduced by amplicon sequencing from the left to the middle part of the diagram. OTU methods guard against false positive inferences by lumping similar sequences together. DADA2 uses a statistical model of amplicon errors to infer the underlying sample sequences directly, and thus tries to denoise the data from the middle to the left.

The output sequences inferred from the Balanced forward reads for UPARSE, DADA2, MED, mothur (average-linkage) and QIIME (uclust).

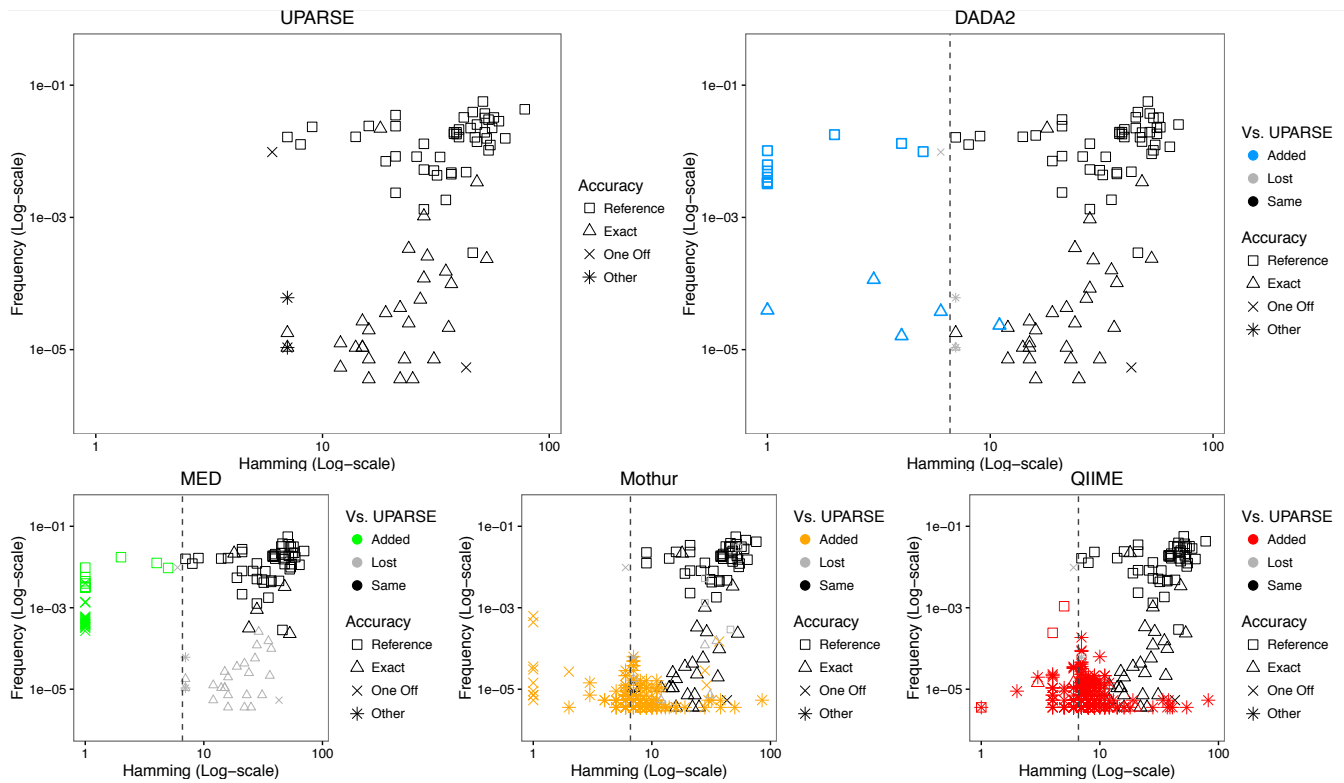

**Figure 2.** Frequency of output sequences from the Balanced forward dataset is plotted on the y-axis. Hamming distance from each sequence to its nearest more-abundant neighbor is plotted on the x-axis. UPARSE is used as a baseline to which the outputs of the other methods are compared. Algorithms largely concur (black) in identifying sequences that are abundant and very different from other sample sequences. However, DADA2 detects additional variation (blue) relative to UPARSE, especially within UPARSE's OTU radius (dashed line). MED also detects some fine-scale variation (green), but at the cost of a significant number of false positives, typically One Offs that are 1-away from a more abundant correct sequence, and MED does not detect low abundance sequences (grey). Mothur (orange) and QIIME (red) both report a large number of additional spurious sequences, although most are relatively low frequency.

The output sequences inferred from the HMP forward reads by UPARSE, DADA2, MED, mothur (average-linkage) and QIIME (uclust).

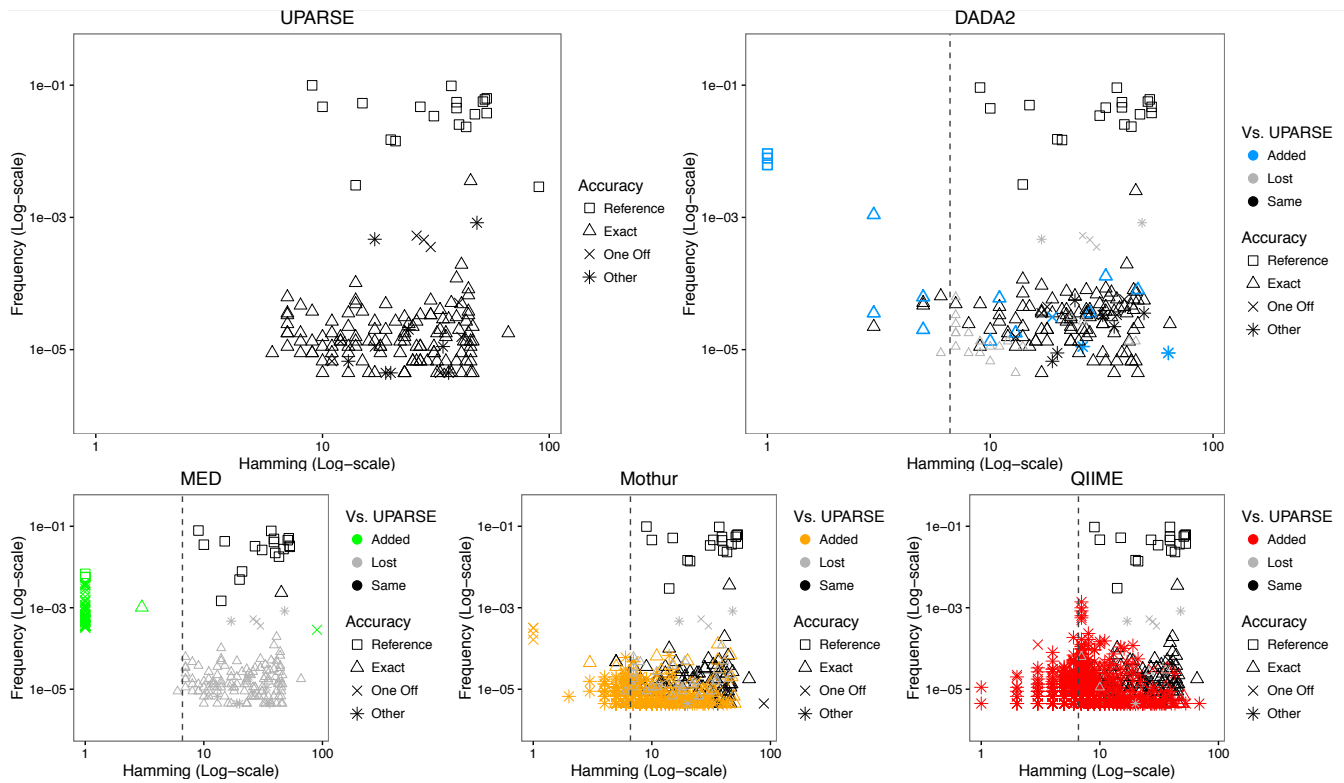

**Figure 3.** Frequency of output sequences from the HMP forward dataset is plotted on the y-axis. Hamming distance from each sequence to its nearest more-abundant neighbor is plotted on the x-axis. UPARSE is used as a baseline to which the outputs of the other methods are compared. Algorithms largely concur (black) in identifying sequences that are abundant and very different from other sample sequences. However, DADA2 detects additional variation (blue) relative to UPARSE, especially within UPARSE’s OTU radius (dashed line). MED also detects some fine-scale variation (green), but at the cost of a significant number of false positives, typically One Offs that are 1-away from a more abundant correct sequence, and MED does not detect low abundance sequences (grey). Mothur (orange) and QIIME (red) both report a large number of additional spurious sequences, although most are relatively low frequency.

The output sequences inferred from the Extreme forward reads by UPARSE, DADA2, MED, mothur (average-linkage) and QIIME (uclust).

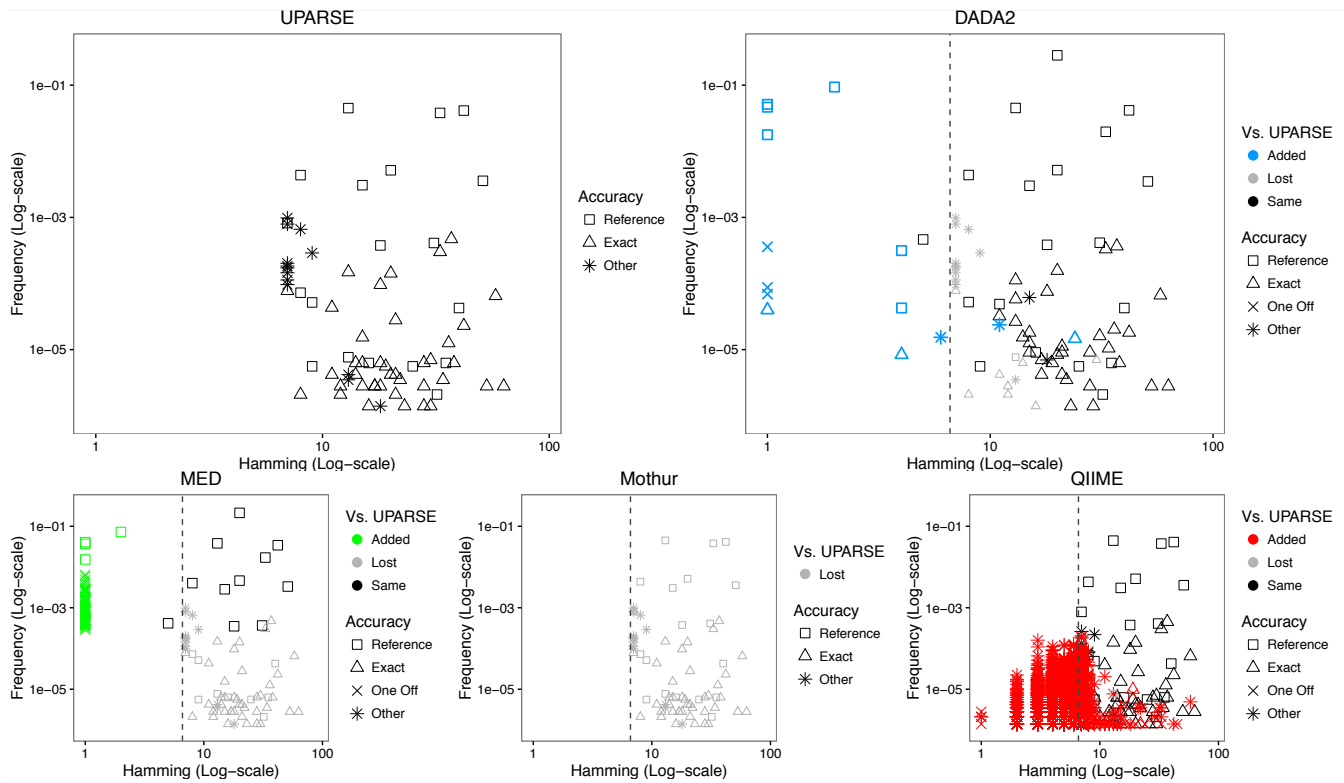

**Figure 4.** Frequency of output sequences from the Extreme forward dataset is plotted on the y-axis. Hamming distance from each sequence to its nearest more-abundant neighbor is plotted on the x-axis. UPARSE is used as a baseline to which the outputs of the other methods are compared. Algorithms largely concur (black) in identifying sequences that are abundant and very different from other sample sequences. However, DADA2 detects additional variation (blue) relative to UPARSE, especially within UPARSE’s OTU radius (dashed line). MED also detects some fine-scale variation (green), but at the cost of a significant number of false positives, typically One Offs that are 1-away from a more abundant correct sequence, and MED does not detect low abundance sequences (grey). QIIME (red) reports a large number of additional spurious sequences, although most are relatively low frequency. Mothur failed to complete on this dataset due to the size of its calculated distance matrix.

The output sequences inferred from the Balanced merged reads by UPARSE, DADA2, MED, mothur (average-linkage) and QIIME (uclust).

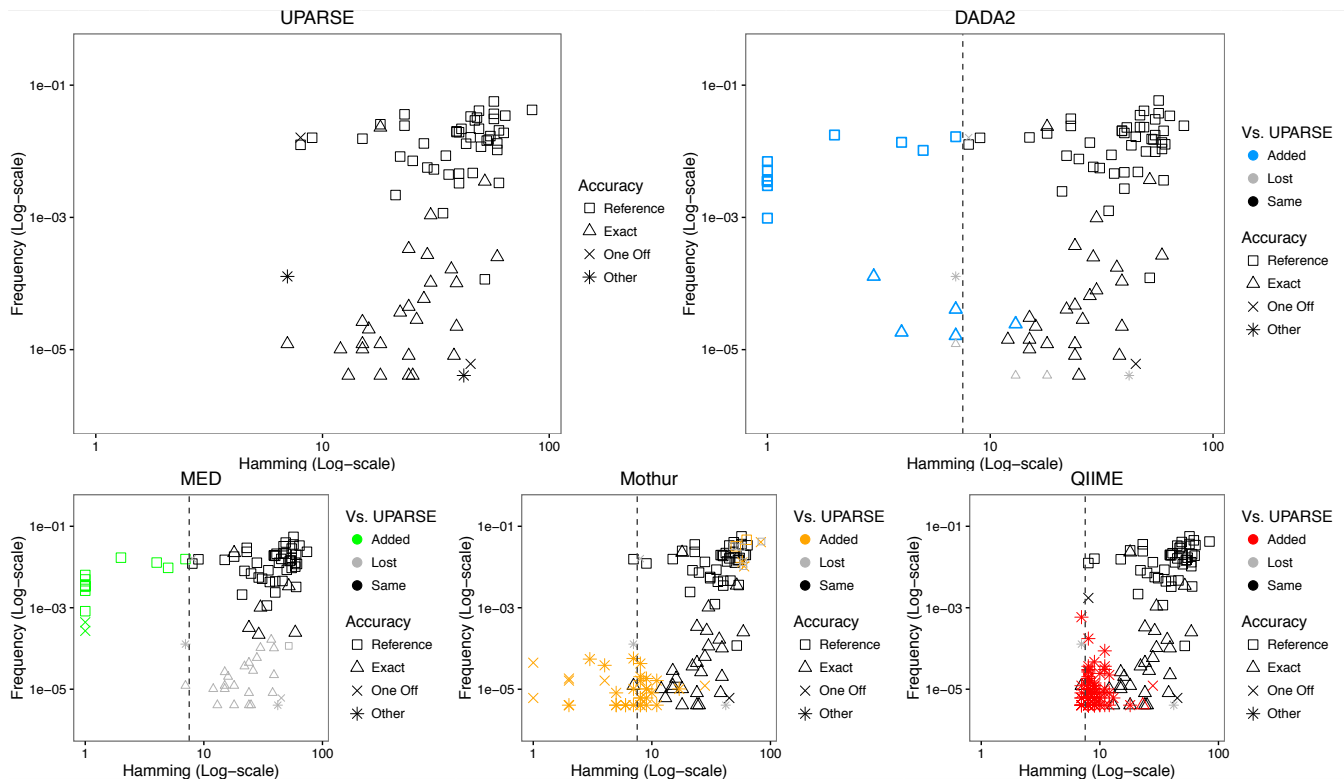

**Figure 5.** Frequency of output sequences from the Balanced merged dataset is plotted on the y-axis. Hamming distance from each sequence to its nearest more-abundant neighbor is plotted on the x-axis. UPARSE is used as a baseline to which the outputs of the other methods are compared. Algorithms largely concur (black) in identifying sequences that are abundant and very different from other sample sequences. However, DADA2 detects additional variation (blue) relative to UPARSE, especially within UPARSE’s OTU radius (dashed line). MED also detects some fine-scale variation (green), but at the cost of some false positives, typically One Offs that are 1-away from a more abundant correct sequence, and MED does not detect low abundance sequences (grey). Mothur (orange) and QIIME (red) both report a significant number of additional spurious sequences, although most are relatively low frequency.

The output sequences inferred from the HMP merged reads by UPARSE, DADA2, MED, mothur (average-linkage) and QIIME (uclust).

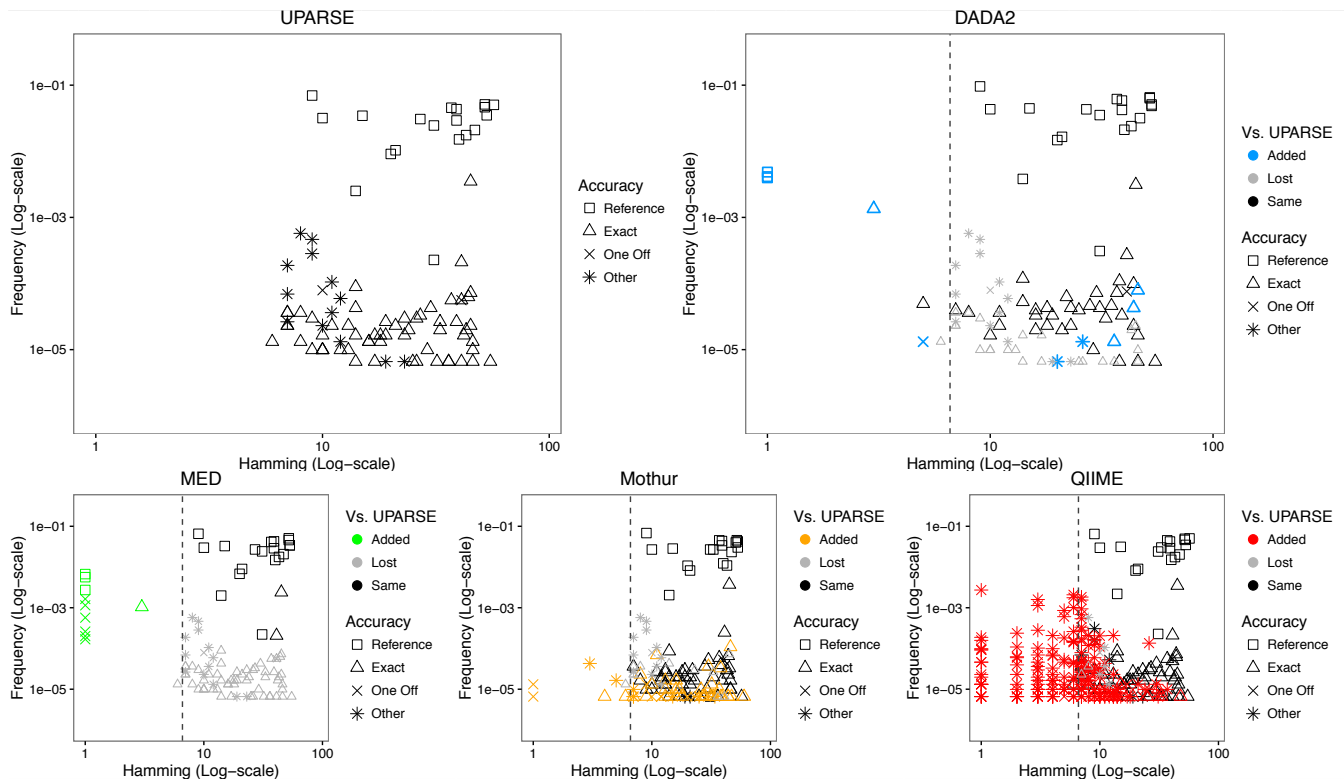

**Figure 6.** Frequency of output sequences from the HMP merged dataset is plotted on the y-axis. Hamming distance from each sequence to its nearest more-abundant neighbor is plotted on the x-axis. UPARSE is used as a baseline to which the outputs of the other methods are compared. Algorithms largely concur (black) in identifying sequences that are abundant and very different from other sample sequences. However, DADA2 detects additional variation (blue) relative to UPARSE, especially within UPARSE’s OTU radius (dashed line). MED also detects some fine-scale variation (green), but at the cost of some false positives, typically One Offs that are 1-away from a more abundant correct sequence, and MED does not detect low abundance sequences (grey). Mothur (orange) and QIIME (red) both report a significant number of additional spurious sequences, although most are relatively low frequency.

The output sequences inferred from the Extreme merged reads by UPARSE, DADA2, MED, mothur (average-linkage) and QIIME (uclust).

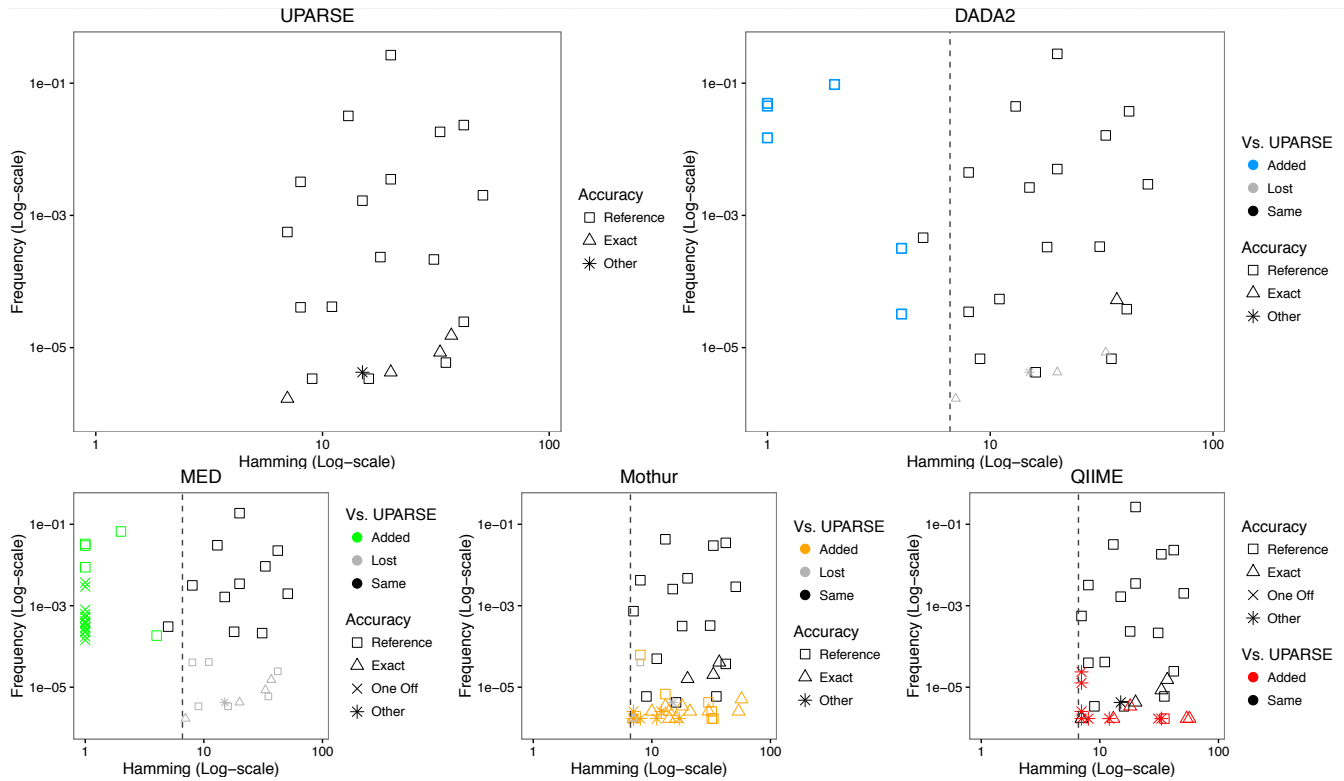

**Figure 7.** Frequency of output sequences from the Extreme merged dataset is plotted on the y-axis. Hamming distance from each sequence to its nearest more-abundant neighbor is plotted on the x-axis. UPARSE is used as a baseline to which the outputs of the other methods are compared. Algorithms largely concur (black) in identifying sequences that are abundant and very different from other sample sequences. However, DADA2 detects additional variation (blue) relative to UPARSE, especially within UPARSE’s OTU radius (dashed line). MED also detects some fine-scale variation (green), but at the cost of some false positives, typically One Offs that are 1-away from a more abundant correct sequence, and MED does not detect low abundance sequences (grey). Mothur (orange) and QIIME (red) both report some additional low-frequency spurious sequences.

### Illumina Miseq error rates as a function of quality.

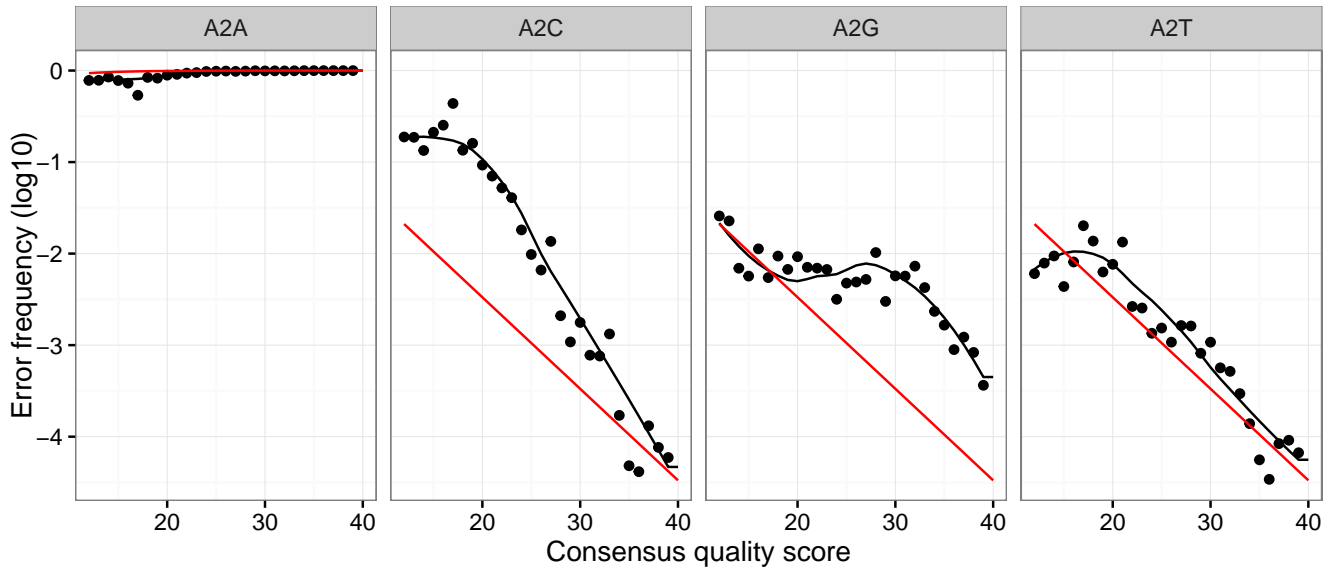

**Figure 8.** The forward-read error rates observed in the 142 pooled samples from MacIntyre 2015 are shown for the case where the correct base is an A. The x-axis shows the quality score; the y-axis the frequency of the specified transition. Dots show the observed frequencies, the black line the error model inferred by DADA2 using its default loess fitting, and the red line the expected rates given the nominal definition of the quality score:  $Q = -10\log_{10}(p_{err})$ . Illumina quality scores are quite informative about substitution error rates, but systematic deviations from the expected rates are observed. This plot was generated by the `plotErrors` function in the DADA2 R package.



## Supplementary Tables

|          | Direction | Reads   | Quality Scores |       |    | Filtered Reads |              |
|----------|-----------|---------|----------------|-------|----|----------------|--------------|
|          |           |         | 1Q             | Mean  | 3Q | Merged         | Forward Only |
| Balanced | Forward   | 593868  | 37             | 35.92 | 38 | 492082         | 557946       |
|          | Reverse   | 593868  | 34             | 33.52 | 39 | 492082         |              |
| HMP      | Forward   | 613352  | 31             | 32.34 | 38 | 303293         | 449269       |
|          | Reverse   | 613352  | 16             | 28.7  | 37 | 303293         |              |
| Extreme  | Forward   | 2082062 | 32             | 33    | 38 | 1178835        | 1431321      |
|          | Reverse   | 2082062 | 23             | 29.33 | 37 | 1178835        |              |

Table 1. Sequencing summary of the Balanced, HMP and Extreme test datasets.

| Strain                                  | Greengenes taxonomy                                                                       | Dilution group   | Tag      |
|-----------------------------------------|-------------------------------------------------------------------------------------------|------------------|----------|
| Bacteroides cellulosilyticus DSM 14838  | k__Bacteria,p__Bacteroidetes,c__Bacteroidia,o__Bacteroidales,f__Bacteroidaceae            | 10 <sup>-1</sup> | t__70164 |
| Bacteroides eggerthii BEI HM-210        | k__Bacteria,p__Bacteroidetes,c__Bacteroidia,o__Bacteroidales,f__Bacteroidaceae            | 10 <sup>-5</sup> | t__91265 |
| Bacteroides fragilis ATCC 23745         | k__Bacteria,p__Bacteroidetes,c__Bacteroidia,o__Bacteroidales,f__Bacteroidaceae            | 10 <sup>-3</sup> | t__84566 |
| Bacteroides massiliensis JCM 12982      | k__Bacteria,p__Bacteroidetes,c__Bacteroidia,o__Bacteroidales,f__Bacteroidaceae            | 10 <sup>-4</sup> | t__38326 |
| Bacteroides ovatus DSM 1896             | k__Bacteria,p__Bacteroidetes,c__Bacteroidia,o__Bacteroidales,f__Bacteroidaceae            | 10 <sup>-0</sup> | t__74296 |
| Bacteroides thetaiotaomicron DSM 2079   | k__Bacteria,p__Bacteroidetes,c__Bacteroidia,o__Bacteroidales,f__Bacteroidaceae            | 10 <sup>-3</sup> | t__50907 |
| Bacteroides uniformis DSM 6597          | k__Bacteria,p__Bacteroidetes,c__Bacteroidia,o__Bacteroidales,f__Bacteroidaceae            | 10 <sup>-2</sup> | t__89266 |
| Bacteroides vulgatus DSM 1447           | k__Bacteria,p__Bacteroidetes,c__Bacteroidia,o__Bacteroidales,f__Bacteroidaceae            | 10 <sup>-0</sup> | t__21615 |
| Barnesiella intestinihominis DSM 21032  | k__Bacteria,p__Bacteroidetes,c__Bacteroidia,o__Bacteroidales,f__[Barnesiellaceae]         | 10 <sup>-5</sup> | t__21316 |
| Clostridium celatum JCM 1394            | k__Bacteria,p__Firmicutes,c__Clostridia,o__Clostridiales,f__Clostridiaceae                | 10 <sup>-3</sup> | t__31700 |
| Clostridium cocleatum DSM 1551          | k__Bacteria,p__Firmicutes,c__Erysipelotrichi,o__Erysipelotrichales,f__Erysipelotrichaceae | 10 <sup>-2</sup> | t__56149 |
| Clostridium methylpentosum DSM 5476     | k__Bacteria,p__Firmicutes,c__Clostridia,o__Clostridiales,f__Ruminococcaceae               | 10 <sup>-5</sup> | t__68506 |
| Clostridium phytofermentans ATCC 700394 | k__Bacteria,p__Firmicutes,c__Clostridia,o__Clostridiales,f__Lachnospiraceae               | 10 <sup>-5</sup> | t__73805 |
| Clostridium xylanovorans DSM 12503      | k__Bacteria,p__Firmicutes,c__Clostridia,o__Clostridiales,f__Lachnospiraceae               | 10 <sup>-1</sup> | t__70731 |
| Coprococcus comes ATCC 27758            | k__Bacteria,p__Firmicutes,c__Clostridia,o__Clostridiales,f__Lachnospiraceae               | 10 <sup>-2</sup> | t__41496 |
| Eubacterium rectale DSM 17629           | k__Bacteria,p__Firmicutes,c__Clostridia,o__Clostridiales,f__Lachnospiraceae               | 10 <sup>-4</sup> | t__53720 |
| Howardella ureilytica DSM 15118         | k__Bacteria,p__Firmicutes,c__Clostridia,o__Clostridiales,f__91otu452                      | 10 <sup>-5</sup> | t__23462 |
| Parabacteroides distasonis JCM 13400    | k__Bacteria,p__Bacteroidetes,c__Bacteroidia,o__Bacteroidales,f__Porphyromonadaceae        | 10 <sup>-5</sup> | t__21798 |
| Parabacteroides distasonis JCM 13401    | k__Bacteria,p__Bacteroidetes,c__Bacteroidia,o__Bacteroidales,f__Porphyromonadaceae        | 10 <sup>-1</sup> | t__1086  |
| Parabacteroides merdae DSM 19495        | k__Bacteria,p__Bacteroidetes,c__Bacteroidia,o__Bacteroidales,f__Porphyromonadaceae        | 10 <sup>-2</sup> | t__33431 |
| Parabacteroides sp. D13 BEI HM-77       | k__Bacteria,p__Bacteroidetes,c__Bacteroidia,o__Bacteroidales,f__Porphyromonadaceae        | 10 <sup>-5</sup> | t__91131 |
| Paraprevotella clara DSM 19731          | k__Bacteria,p__Bacteroidetes,c__Bacteroidia,o__Bacteroidales,f__[Paraprevotellaceae]      | 10 <sup>-4</sup> | t__81974 |
| Prevotella buccalis ATCC 35310          | k__Bacteria,p__Bacteroidetes,c__Bacteroidia,o__Bacteroidales,f__Prevotellaceae            | 10 <sup>-5</sup> | t__52712 |
| Prevotella copri DSM 18205              | k__Bacteria,p__Bacteroidetes,c__Bacteroidia,o__Bacteroidales,f__Prevotellaceae            | 10 <sup>-5</sup> | t__30223 |
| Roseburia intestinalis DSM 14610        | k__Bacteria,p__Firmicutes,c__Clostridia,o__Clostridiales,f__Lachnospiraceae               | 10 <sup>-4</sup> | t__27000 |
| Roseburia inulinivorans DSM 16841       | k__Bacteria,p__Firmicutes,c__Clostridia,o__Clostridiales,f__Lachnospiraceae               | 10 <sup>-3</sup> | t__29181 |
| Ruminococcus gnavus ATCC 29149          | k__Bacteria,p__Firmicutes,c__Clostridia,o__Clostridiales,f__Lachnospiraceae               | 10 <sup>-5</sup> | t__30356 |

Table 2. Composition of Extreme mock community. Tags were included in the id lines of the fasta reads from each amplified strain.

|                 |        | <b>Forward</b> |          |              | <b>Merged</b> |          |              |
|-----------------|--------|----------------|----------|--------------|---------------|----------|--------------|
|                 |        | Total          | Chimeric | Non-chimeric | Total         | Chimeric | Non-chimeric |
| <b>Balanced</b> | DADA2  | 0              | 0        | 0            | 0             | 0        | 0            |
|                 | UPARSE | 2              | 0        | 2            | 2             | 1        | 1            |
|                 | MED    | 0              | 0        | 0            | 0             | 0        | 0            |
|                 | Mothur | 165            | 102      | 63           | 28            | 10       | 18           |
|                 | QIIME  | 290            | 185      | 105          | 93            | 71       | 22           |
| <b>HMP</b>      | DADA2  | 8              | 1        | 7            | 2             | 0        | 2            |
|                 | UPARSE | 8              | 0        | 8            | 13            | 10       | 3            |
|                 | MED    | 0              | 0        | 0            | 0             | 0        | 0            |
|                 | Mothur | 605            | 58       | 547          | 10            | 4        | 6            |
|                 | QIIME  | 1118           | 182      | 936          | 191           | 110      | 81           |
| <b>Extreme</b>  | DADA2  | 4              | 0        | 4            | 0             | 0        | 0            |
|                 | UPARSE | 13             | 0        | 13           | 1             | 0        | 1            |
|                 | MED    | 0              | 0        | 0            | 0             | 0        | 0            |
|                 | Mothur | *              | *        | *            | 7             | 0        | 7            |
|                 | QIIME  | 3100           | 5        | 3095         | 8             | 0        | 8            |

**Table 3. Classification of Other sequences as chimeric or non-chimeric.** The uparse-ref algorithm was used to classify the Other sequences output by each method as chimeric or non-chimeric by comparison to the references sequences for each mock community. The same parameter setting for uparse-ref were used as in [9].

## Supplementary Notes

### Supplementary Note 1: The limits of DADA2’s sensitivity to rare variants

DADA2 relies on repeated observations of a sequence to distinguish biological variants from sequencing error. Thus, in order to identify a biological variant, there must be at least 2 error-free reads of that sequence variant present in the data, with more required if the variant is close to another sample sequence. Given a sequencing depth  $D$ , and a fraction of error-free sequences  $f$  (this varies greatly, but  $f \sim 0.5$  is not uncommon for Illumina Miseq 2x250 forward reads), DADA2 will not effectively identify variants with frequencies at or below  $2/Df$ , as such variants are unlikely to produce at least two error-free reads.

This limitation is illustrated by the 4 reference strains DADA2 failed to detect in the forward reads of the Extreme dataset. Strains in this dataset were separately PCR-ed and tagged with an indexing barcode, so we can use that information (encoded in the id line of the fastq file) to examine these false negatives in detail. Each strain that DADA2 failed to identify in the forward reads is listed below. NN refers to the nearest neighbor, i.e. the most similar sequence that was identified by DADA2. Max abundance is the maximum abundance among the unique sequences present in each strain’s reads:

| Strains missed by DADA2                    | Total Reads | Max Abundance | Hamming to NN | NN Abundance | Tag      |
|--------------------------------------------|-------------|---------------|---------------|--------------|----------|
| <i>Prevotella buccalis</i>                 | 5           | 1             | 51            | 9            | t__52712 |
| <i>Clostridium methylpentosum</i> DSM 5476 | 5           | 1             | 25            | 13           | t__68506 |
| <i>Clostridium phytofermentans</i> ISDg    | 11          | 2             | 15            | 59564        | t__73805 |
| <i>Parabacteroides</i> sp. D13             | 3           | 2             | 1             | 28242        | t__91131 |

*Prevotella buccalis* and *Clostridium methylpentosum* cannot be identified by DADA2 because the reads from those strains are all unique singletons. The *Parabacteroides* sp. D13 reads include a doubleton sequence, but it is 1-away from another real variant with abundance 28242, and it is not possible to statistically differentiate sequences at such low abundance so near to another sequence at such high abundance from errors. Finally, *Clostridium phytofermentans* has a doubleton that is 15-away from another inferred sequence with  $\sim 60k$  reads. This is on the boundary of DADA2’s sensitivity under the default sensitivity parameter  $\Omega_A = 10^{-40}$ , and if this parameter is made less conservative DADA2 will detect this sequence. However, here we used default parameters, including the conservative default  $\Omega_A$ .

## Supplementary Note 2: Comparing uchime and isBimeraDenovo

The common chimera identification algorithms, and uchime in particular, were designed under the assumption that sensitivity on nearby chimeric variants was not very important because nearby variants were likely to be joined into the same OTU anyway. However, this assumption is violated by DADA2, as DADA2 distinguishes variants that differ by as little as one nucleotide. To overcome this shortcoming we developed a simple new algorithm (isBimeraDenovo) that can identify chimeras at any separation (Methods).

To test the sensitivity and specificity of isBimeraDenovo we processed the Balanced forward reads with DADA2 and with QIIME/ucrust without any chimera filtering, and then compared the results of isBimeraDenovo and uchime on the output of each method. The rows (isBimeraDenovo) and columns (uchime) of these 2x2 tables correspond to whether a sequence was identified as non-chimeric (FALSE) or chimeric (TRUE). The entries indicate the number of corresponding output sequences or OTUs, and in parentheses are the number of those sequences that exactly (matched, did not match) a reference sequence or nt (Methods).

|                |       | uchime       |                |
|----------------|-------|--------------|----------------|
|                |       | FALSE        | TRUE           |
| isBimeraDenovo | FALSE | 92<br>(91/1) | 1<br>(1/0)     |
|                | TRUE  | 44<br>(2/44) | 166<br>(3/133) |

DADA2 output

|                |       | uchime             |                  |
|----------------|-------|--------------------|------------------|
|                |       | FALSE              | TRUE             |
| isBimeraDenovo | FALSE | 1175<br>(110/1065) | 70<br>(0/70)     |
|                | TRUE  | 224<br>(4/220)     | 1042<br>(1/1041) |

QIIME output

When applied to the DADA2 output sequences, isBimeraDenovo and uchime mostly agreed: 166/211 output sequences flagged by either algorithm were flagged by both. The main difference between methods were the 44 sequences flagged as chimeric by DADA2 but not by uchime. Of those 44 sequences, 42/44 did not match a reference sequence or nt, consistent with these putative chimeras being spurious variants. Furthermore, the 1 sequence that uchime alone flagged as chimeric was an exact match, consistent with this variant being a real sequence that isBimeraDenovo correctly left unflagged.

The results on the output from QIIME/ucrust were less clear. While the algorithms again agreed on most chimera calls, each algorithm flagged a significant number of sequences that the other did not, and both sets of algorithm-specific chimera calls appeared to consist primarily of spurious sequences. isBimeraDenovo

flagged 224 sequences that uchime did not, of which 220/224 were not matches, while uchime flagged 70 sequences that isBimeraDenovo did not, of which 70/70 were not matches.

For a closer look at the characteristics of the chimeras identified by isBimeraDenovo in the DADA2 output, we plotted a histogram of the sequences flagged by each algorithm as a function of the hamming distance between the flagged sequences and the nearest more abundant output sequence.

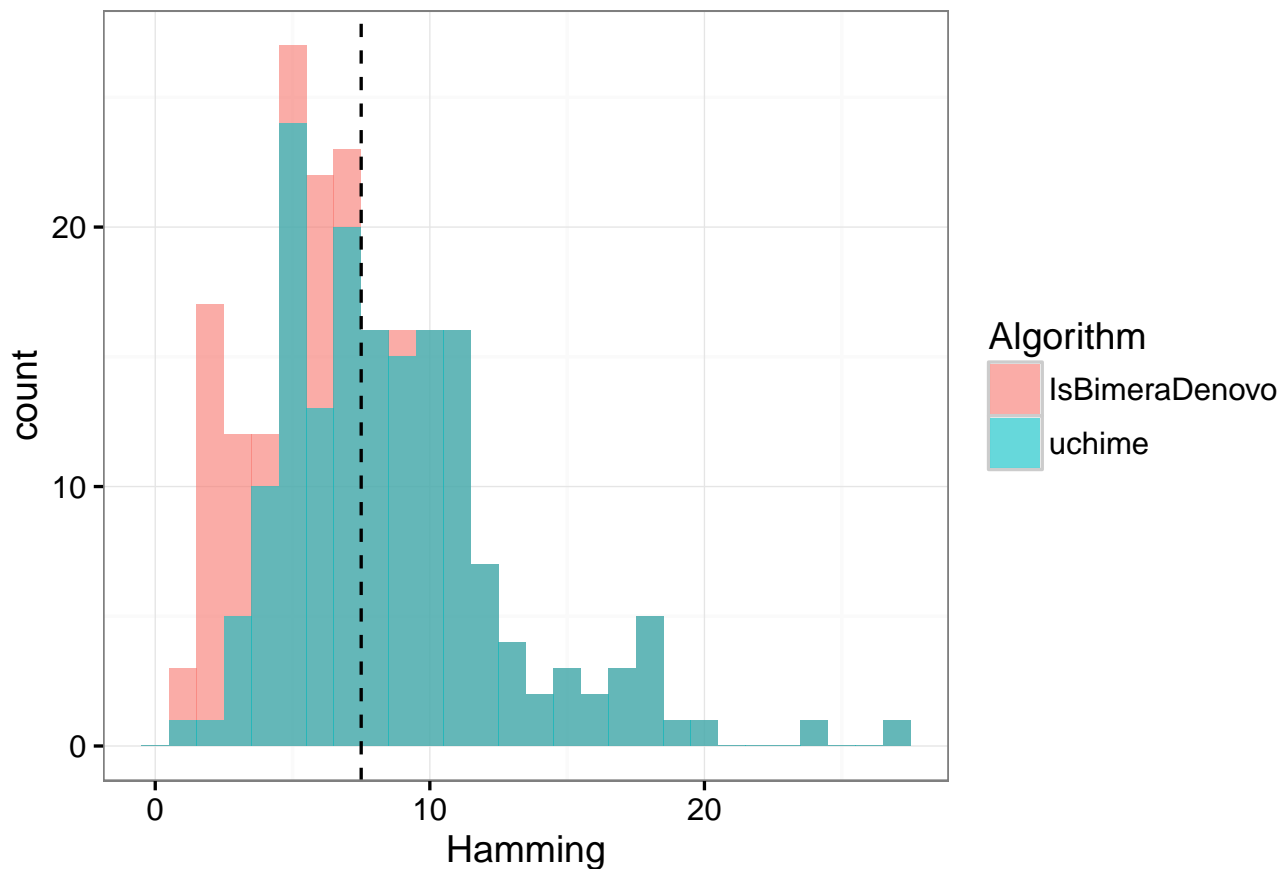

The histograms for each method are overlaid on top of each other, and the uchime bars are completely overlapped by the isBimeraDenovo bars. The excess area of the isBimeraDenovo bars shows that the additional variants it identified relative to uchime were nearby other output sequences, and in fact were almost entirely within 3% of a more abundant sequence (dashed line).

In total, these results show that isBimeraDenovo is more sensitive to nearby chimeras than uchime while having a similarly high level of specificity. This makes isBimeraDenovo particularly well-suited for exact sample inference methods like DADA2 which distinguish closely related sequences. The evidence for the utility of isBimeraDenovo with fuzzier OTU methods was more mixed. The increased sensitivity of

isBimeraDenovo to nearby variants was useful for QIIME/ucrust as well, but isBimeraDenovo failed to identify some chimeras with residual errors and chimeras whose "parent sequences" were subsumed into another OTU.
